# Supplementary material for: Molecular Characterization of the Recently Emerged Poultry Pathogen Ornithobacterium rhinotracheale by Multilocus Sequence Typing
Source: PubMed Central journal article supplement (PMC4734695; doi:10.1371/journal.pone.0148158), 2016-02-01
Supplement: pone.0148158.s001.pdf [file pone.0148158.s001.pdf]

### Supplemental table

| No.                      | Strain designation | Year of isolation | Host        | Geographic origin | Serotype | Sequence Type |
|--------------------------|--------------------|-------------------|-------------|-------------------|----------|---------------|
| <b>REFERENCE STRAINS</b> |                    |                   |             |                   |          |               |
| 1                        | DSM 15997          | 1988              | Turkey      | United Kingdom    | A, I     | 1             |
| 2                        | RefA               | 1991              | Chicken     | South Africa      | A        | 1             |
| 3                        | RefB               | 1991              | Turkey      | Germany           | B        | 1             |
| 4                        | RefC               | 1991              | Chicken     | California, USA   | C        | 2             |
| 5                        | RefD               | 1994              | Turkey      | France            | D        | 3             |
| 6                        | RefE               | 1995              | Chicken     | France            | E        | 1             |
| 7                        | RefF               | 1994              | Turkey      | The Netherlands   | F        | 4             |
| 8                        | RefG               | 1995              | Chicken     | France            | G        | 5             |
| 9                        | RefH               | 1994              | Turkey      | The Netherlands   | H        | 3             |
| 10                       | RefI               | 1996              | Turkey      | Minnesota, USA    | I        | 1             |
| 11                       | RefJ               | 1997              | Chicken     | The Netherlands   | J        | 6             |
| 12                       | RefK               | 1997              | Chicken     | USA               | K        | 6             |
| 13                       | RefL               | 1997              | Turkey      | United Kingdom    | L        | 6             |
| 14                       | RefM               | 1998              | Turkey      | France            | M        | 1             |
| 15                       | RefN               | 1992              | Guinea fowl | Belgium           | N        | 7             |
| 16                       | RefO               | 1983              | Rook        | Germany           | O        | 8             |
| 17                       | RefP               | 1999              | Turkey      | United Kingdom    | P        | 1             |
| 18                       | RefQ               | 1995              | Chicken     | The Netherlands   | Q        | 3             |
| <b>FIELD STRAINS</b>     |                    |                   |             |                   |          |               |
| 19                       | GK 304/95          | 1995              | Chicken     | Germany           | A        | 1             |
| 20                       | GK 1049/95         | 1995              | Chicken     | Germany           | A        | 1             |
| 21                       | GK 1112/96         | 1996              | Pheasant    | Germany           | D        | 3             |
| 22                       | GB 137/10/1        | 2010              | Laying hen  | Germany           | A        | 1             |
| 23                       | GB 137/10/2        | 2010              | Laying hen  | Germany           | n.t.     | 10            |
| 24                       | GB 299/10/6        | 2010              | Turkey      | Germany           | B, E     | 1             |
| 25                       | GB 299/10/7        | 2010              | Turkey      | Germany           | E        | 1             |

|    |               |      |         |         |             |    |
|----|---------------|------|---------|---------|-------------|----|
| 26 | GB 299/10/8   | 2010 | Turkey  | Germany | n.t.        | 1  |
| 27 | GB 404/10/1   | 2010 | Turkey  | Germany | n.t.        | 11 |
| 28 | GB 404/10/2   | 2010 | Turkey  | Germany | I (J)       | 1  |
| 29 | GB 596/10/2   | 2010 | Turkey  | Germany | A, I        | 1  |
| 30 | GB 610/10/1   | 2010 | Turkey  | Germany | E           | 1  |
| 31 | GB 610/10/2   | 2010 | Turkey  | Germany | E           | 1  |
| 32 | GB 610/10/3   | 2010 | Turkey  | Germany | E           | 1  |
| 33 | GB 738/10/1   | 2010 | Turkey  | Germany | n.t.        | 11 |
| 34 | GB 738/10/2   | 2010 | Turkey  | Germany | E           | 1  |
| 35 | GB 738/10/3   | 2010 | Turkey  | Germany | C           | 11 |
| 36 | GB 738/10/4   | 2010 | Turkey  | Germany | A           | 1  |
| 37 | GB 1032/10/1  | 2010 | Turkey  | Germany | B, L        | 1  |
| 38 | GB 56/11/1    | 2011 | Turkey  | Germany | A           | 1  |
| 39 | GB 57/11/1    | 2011 | Turkey  | Germany | A           | 1  |
| 40 | GB 57/11/2    | 2011 | Turkey  | Germany | A           | 1  |
| 41 | GB 604/11/3   | 2011 | Turkey  | Germany | A, I        | 9  |
| 42 | GB 1103/11/1  | 2011 | Turkey  | Germany | E (J,K)     | 9  |
| 43 | GB 1573/11/16 | 2011 | Turkey  | Germany | B (I,J,L)   | 1  |
| 44 | GB 1573/11/17 | 2011 | Turkey  | Germany | n.t.        | 12 |
| 45 | GB 1573/11/18 | 2011 | Turkey  | Germany | A (I,J,L)   | 1  |
| 46 | GB 2151/11/1  | 2011 | Turkey  | Germany | B (I,J)     | 1  |
| 47 | GB 2151/11/2  | 2011 | Turkey  | Germany | A (B,I)     | 1  |
| 48 | GB 2151/11/3  | 2011 | Turkey  | Germany | A (B,I)     | 1  |
| 49 | GB 2221/11/1  | 2011 | Turkey  | Germany | A (K)       | 9  |
| 50 | GB 2221/11/2  | 2011 | Turkey  | Germany | A           | 9  |
| 51 | GB 2221/11/3  | 2011 | Turkey  | Germany | A           | 9  |
| 52 | GB 365/12/1   | 2012 | Turkey  | Germany | B, J        | 9  |
| 53 | GB 1538/12/1  | 2012 | Turkey  | Germany | A           | 9  |
| 54 | GB 2177/13/1  | 2013 | Turkey  | Germany | I           | 9  |
| 55 | GB 2269/13/1  | 2013 | Chicken | Germany | I           | 9  |
| 56 | GB 2399/13/1  | 2013 | Chicken | Germany | A           | 13 |
| 57 | GB 2992/13    | 2013 | Turkey  | Germany | I           | 9  |
| 58 | GB 3031/13/1  | 2013 | Turkey  | Germany | E (G, J, K) | 1  |

|    |               |      |         |                |                   |    |
|----|---------------|------|---------|----------------|-------------------|----|
| 59 | GB 3031/13/2  | 2013 | Turkey  | Germany        | E (B, G, J, K)    | 1  |
| 60 | GB 3074/13    | 2013 | Turkey  | Germany        | I (B, E, G, K, L) | 9  |
| 61 | GB 3111/13/1  | 2013 | Turkey  | Germany        | I (B, E, G, J, L) | 9  |
| 62 | GB 3111/13/2  | 2013 | Turkey  | Germany        | E, G              | 1  |
| 63 | GB 3111/13/3  | 2013 | Turkey  | Germany        | I (B, G)          | 9  |
| 64 | GB 978/14/1   | 2008 | Turkey  | Germany        | F (H)             | 14 |
| 65 | GB 1580/14/2  | 2014 | Turkey  | Germany        | H                 | 11 |
| 66 | GB 1312/05/1  | 2005 | Turkey  | France         | J                 | 9  |
| 67 | GB 1312/05/2  | 2005 | Turkey  | France         | C                 | 1  |
| 68 | GB 1312/05/3  | 2005 | Turkey  | France         | A                 | 9  |
| 69 | GB 1312/05/8  | 2005 | Turkey  | France         | I                 | 1  |
| 70 | GB 1312/05/22 | 2005 | Turkey  | France         | J                 | 9  |
| 71 | GB 1312/05/23 | 2005 | Turkey  | France         | B (C)             | 1  |
| 72 | GB 371/09/5   | 2009 | Turkey  | Chile          | I (J)             | 9  |
| 73 | GB 371/09/6   | 2009 | Turkey  | Chile          | I (J,L)           | 9  |
| 74 | GB 371/09/7   | 2009 | Turkey  | Chile          | I (J,L)           | 9  |
| 75 | GB 735/09/10  | 2009 | Turkey  | Chile          | A                 | 9  |
| 76 | GB 735/09/12  | 2009 | Turkey  | Chile          | A                 | 9  |
| 77 | GB 735/09/13  | 2009 | Turkey  | Chile          | A                 | 9  |
| 78 | GB 1707/12/1  | 2012 | Chicken | China          | - <sup>a</sup>    | 1  |
| 79 | GB 1707/12/2  | 2012 | Chicken | China          | - <sup>a</sup>    | 1  |
| 80 | GB 1707/12/3  | 2012 | Chicken | China          | - <sup>a</sup>    | 1  |
| 81 | GB 1707/12/7  | 2012 | Chicken | China          | - <sup>a</sup>    | 1  |
| 82 | GB 804/13/1   | 2013 | Turkey  | United Kingdom | I                 | 9  |
| 83 | GB 804/13/2   | 2013 | Turkey  | United Kingdom | A (I)             | 9  |
| 84 | GB 804/13/3   | 2013 | Turkey  | United Kingdom | I                 | 9  |
| 85 | GB 954/13/1   | 2013 | Turkey  | United Kingdom | A, I              | 1  |
| 86 | GB 954/13/2   | 2013 | Turkey  | United Kingdom | A, I              | 9  |
| 87 | GB 954/13/3   | 2013 | Turkey  | United Kingdom | A, I              | 9  |
